# Supplementary material for: Association of glucose-6-phosphate dehydrogenase deficiency and malaria: a systematic review and meta-analysis
Source: PubMed Central journal article supplement (PMC5382680; doi:10.1038/srep45963), 2017-04-06
Supplement: srep45963-s1.pdf [file srep45963-s1.pdf]

## **Association of glucose-6-phosphate dehydrogenase deficiency and malaria: a systematic review and meta-analysis**

Evaristus Chibunna Mbanefo<sup>1,2,\*</sup>, Ali Mahmoud Ahmed<sup>3,\*</sup>, Afaf Titouna<sup>1,\*</sup>, Ahmed Elmaraezy<sup>3,\*</sup>, Nguyen Thi Huyen Trang<sup>4</sup>, Nguyen Phuoc Long<sup>5</sup>, Nguyen Hoang Anh<sup>6</sup>, Tran Diem Nghi<sup>6</sup>, Bui The Hung<sup>5</sup>, Mai Van Hieu<sup>6</sup>, Nguyen Ky Anh<sup>5</sup>, Nguyen Tien Huy<sup>7,8</sup>, & Kenji Hirayama<sup>1</sup>

<sup>1</sup>Department of Immunogenetics, Institute of Tropical Medicine (NEKKEN), Nagasaki University, Sakamoto, Nagasaki, Japan.

<sup>2</sup>Department of Parasitology and Entomology, Nnamdi Azikiwe University, P.M.B. Awka, Nigeria.

<sup>3</sup>Faculty of Medicine, Al-Azhar University, Cairo, Egypt.

<sup>4</sup>University of Medicine and Pharmacy at Hue City, Hue City, Vietnam.

<sup>5</sup>University of Medicine and Pharmacy at Ho Chi Minh City, Hong Bang, Ho Chi Minh, Vietnam.

<sup>6</sup>School of Medicine, Vietnam National University, Ho Chi Minh City, Ho Chi Minh, Vietnam.

<sup>7</sup>Evidence Based Medicine Research Group & Faculty of Applied Sciences, Ton Duc Thang University, Ho Chi Minh City, Vietnam.

<sup>8</sup>Department of Clinical Product Development, Institute of Tropical Medicine (NEKKEN), Nagasaki University, Sakamoto, Nagasaki, Japan.

\*These authors contributed equally to this study

Correspondence and requests for materials should be addressed to N.T.H. (email: [nguyentienhuy@tdt.edu.vn](mailto:nguyentienhuy@tdt.edu.vn)) or K.H. (email: [hiraken@nagasaki-u.ac.jp](mailto:hiraken@nagasaki-u.ac.jp))

## **File S1. Search strategy**

Nine electronic searches were conducted to find relevant studies. Initial searches were done using PubMed and Scopus databases using the broad search term: “((Glucose-6-phosphate dehydrogenase OR G6PD) AND (Malaria[Mesh] OR Antimalarials[Mesh])) and (INDEXTERMS (glucose-6-phosphate dehydrogenase OR g6pd) AND (malaria OR antimalarials))”. We removed reviews, conference abstracts and editorials. For the search on ISI database, we used the term: “((glucose-6-phosphate dehydrogenase OR g6pd) AND (malaria OR antimalarials))”, but this search was refined by: [excluding] document type as :(Meeting abstract or note or book chapter or review or editorial material or news item). For Google Scholar, first, we performed the search with the exact phrase: glucose 6 phosphate dehydrogenase, with at least one of the words: malaria/antimalarial, further using (allintitle: malaria OR antimalarial "glucose 6 phosphate dehydrogenase") and then with (allintitle: malaria OR antimalarial "G6PD"). With WHO Global Health Library search, the used search term was: ((glucose 6 phosphate dehydrogenase) OR (G6PD)) and (Malaria OR Antimalarials). For Cochrane Library, IBECS, we filled the term: ((glucose 6 phosphate dehydrogenase) OR (G6PD)) and (Malaria OR Antimalarials)). POPLINE advanced search was performed using the term: (All Fileds: glucose 6 phosphate dehydrogenase OR g6pd AND keywords: malaria or antimalarials). While the search on New York Academy of Medicine Grey Literature Report and SIGLE (System for Information on Grey Literature in Europe) databases were searched with broad term: ((glucose 6 phosphate dehydrogenase) OR (G6PD)) and (Malaria OR Antimalarials).

**Table S1. Characteristics of included studies**

| ID                       | Country          | Year of recruitment  | Study design    | Subject of study        | Total sample size. | Age          |              | Gender (Female) |      | Test detection of malaria  | Malaria strain              | PCR related methods for G6PD |                                | Phenotype method for G6PD (enzyme activity) | Malaria patients |            |
|--------------------------|------------------|----------------------|-----------------|-------------------------|--------------------|--------------|--------------|-----------------|------|----------------------------|-----------------------------|------------------------------|--------------------------------|---------------------------------------------|------------------|------------|
|                          |                  |                      |                 |                         |                    | Median/Max** | Range/SD*    | N               | %    |                            |                             | PCR type                     | Other tests                    |                                             | N                | %          |
| <b>Fanello 2008</b>      | Rwanda           | 2005-2006            | RCT             | Infant and children     | 792                | NA           | 0.5-4.9y     | NA              | NA   | NA                         | Falciparum                  | PCR-RFLP                     | NA                             | NA                                          | 702              | <b>89</b>  |
| <b>Guindo 2007</b>       | Mali             | 1997-1998, 2001-2004 | case control    | children                | 3197               | NA           | NA           | 16              | 51.3 | NA                         | Falciparum                  | PCR-RFLP                     | NA                             | NA                                          | 276              | <b>86</b>  |
| <b>Guindo 2007a</b>      | Mali             | 1997-1998, 2001-2004 | case control    | children                | 3197               | NA           | NA           | 16              | 51.3 | NA                         | Falciparum                  | PCR-RFLP                     | NA                             | NA                                          | 432              | <b>14</b>  |
| <b>Adinortey 2011</b>    | Ghana            | NA                   | case control    | NA                      | 142                | NA           | NA           | 65              | 45.8 | Giemsa staining method     | Falciparum                  | NA                           | NA                             | MetHb reduction test                        | 70               | <b>49</b>  |
| <b>Allison 1961</b>      | Tanganyika       | NA                   | case control    | Infant, children        | 876                | NA           | 0.33-4y      | 45              | 51.6 | Blood film                 | Falciparum                  | NA                           | NADP                           | NA                                          | 562              | <b>64</b>  |
| <b>Awah 2012</b>         | Nigeria          | NA                   | cross section   | Children and adult      | 400                | NA           | 5-50y        | 15              | 39.0 | Giemsa or Leishman stain   | Falciparum                  | NA                           | NA                             | Methaemoglobin                              | 155              | <b>39</b>  |
| <b>Awah 2008</b>         | Cameroon         | NA                   | Cross section   | children and adult      | 80                 | NA           | 3-70y        | NA              | NA   | Giemsa or Leishman stained | Falciparum                  | NA                           | NA                             | fluorescent screening                       | 80               | <b>100</b> |
| <b>Bienzle 1979</b>      | Nigeria          | NA                   | Cross setion    | children                | 702                | NA           | 1-6y         | 32              | 46.0 | NA                         | Falciparum                  | NA                           | NA                             | gel electrophoresis                         | 461              | <b>66</b>  |
| <b>Bienzle 1980</b>      | Nigeria          | 1969-1970            | cross section   | children                | 702                | NA           | 0.75-6y      | 32              | 46.0 | Blood film                 | Falciparum                  | NA                           | NA                             | NA                                          | 461              | <b>66</b>  |
| <b>Brabin 1990</b>       | Papua New Guinea | 1987-1988            | Cross section   | NA                      | 302                | NA           | NA           | 0               | 0.0  | NA                         | Falciparum, another species | NA                           | NA                             | fluorescent screening                       | 285              | <b>94</b>  |
| <b>Domarle 1990</b>      | Gabon            | 1998                 | Cross sectional | Children                | 61                 | 10.0         | 4.99y*       | 27              | 44.3 | Blood smear                | Falciparum                  | NA                           | NADPH                          | NA                                          | 41               | <b>67</b>  |
| <b>Dunyo 2011</b>        | The Gambia       | 2004                 | RCT             | Infant + children       | 618                | 5y           | 0.5-11y      | 33              | 54.5 | Blood film                 | Falciparum                  | PCR-RFLP                     | NA                             | NA                                          | 618              | <b>100</b> |
| <b>Dunyo 2011a</b>       | The Gambia       | 2004                 | RCT             | Infant + children       | 620                | 4.8y         | 0.5-10.8y    | 29              | 46.9 | Blood film                 | Falciparum                  | PCR-RFLP                     | NA                             | NA                                          | 620              | <b>100</b> |
| <b>Gilles 1967</b>       | Nigeria          | NA                   | cross section   | children                | 300                | NA           | 0.5-4y       | 14              | 47.7 | NA                         | Falciparum                  | NA                           | NA                             | NA                                          | 100              | <b>33</b>  |
| <b>Enevold 2008</b>      | Tanzania         | 2001                 | Case control    | Infant, children, adult | 196                | 5.9y         | 5.2-6.8y     | 10              | 54.1 | Blood slide                | Falciparum                  | PCR - SSOP                   | NA                             | NA                                          | 159              | <b>81</b>  |
| <b>Jalloh 2004</b>       | Myanmar          | 2002-2003            | cross section   | children and adults     | 650                | 21.5y        | 1-75 yrs     | 30              | 47.5 | thin aNA thick smears      | Falciparum, Vivax, Malariae | NA                           | NADPH                          | NA                                          | 289              | <b>44</b>  |
| <b>Jalloh 2004a</b>      | Indonesia        | 2002-2003            | cross section   | children and adults     | 709                | NA           | NA           | 33              | 47.2 | thin aNA thick smears      | Falciparum, Vivax, Malariae | NA                           | NADPH                          | NA                                          | 308              | <b>43</b>  |
| <b>Khim 2013</b>         | Cambodia         | 2010-2012            | Cross sectional | Children + adult        | 965                | 26.5y        | 25.8 - 27.2y | 22              | 23.4 | Blood film                 | Falciparum, Vivax           | PCR-RFLP                     | NA                             | NA                                          | 965              | <b>100</b> |
| <b>Kruatrachue 1966</b>  | Thailand         | NA                   | cross sectional | infant, children        | 1012               | NA           | 0-3y         | 48              | 47.7 | Blood film                 | Falciparum, vivax           | NA                           | NA                             | NA                                          | 110              | <b>11</b>  |
| <b>Kruatrachue 1962</b>  | Thailand         | NA                   | cross sectional | children                | 519                | NA           | 1-9y         | 0               | 0.0  | Blood film                 | Falciparum, vivax           | NA                           | NA                             | NA                                          | 212              | <b>41</b>  |
| <b>Lell 1998</b>         | Gabon            | 1995-1996            | case-control    | children                | 200                | 3.7y         | NA           | 12              | 61.0 | NA                         | Falciparum                  | PCR                          | subsequent hybridization       | NA                                          | 200              | <b>100</b> |
| <b>Leslie 2010</b>       | Pakistan         | 2006                 | case control    | children                | 1115               | 13.6y        | NA           | 64              | 57.5 | NA                         | Vivax                       | PCR                          | NA                             | Colorimetry                                 | 372              | <b>33</b>  |
| <b>Louicharoen 2009</b>  | Thailand         | 1998-2005            | cross section   | children and adults     | 227                | NA           | NA           | 92              | 40.5 | NA                         | Vivax                       | NA                           | LRH test                       | NA                                          | 227              | <b>100</b> |
| <b>Louicharoen 2009a</b> | Thailand         | 1998-2005            | cross section   | children and adults     | 400                | NA           | NA           | 17              | 43.8 | NA                         | Falciparum                  | NA                           | LRH test                       | NA                                          | 400              | <b>100</b> |
| <b>Nkuo-Akenji 2004</b>  | Cameroon         | 2002                 | cross sectional | Children and Adult      | 222                | NA           | 1-60y        | 11              | 50.9 | Blood film                 | Falciparum, malariae        | NA                           | Met-haemoglobin reduction test | NA                                          | 150              | <b>68</b>  |
| <b>Myint-Oo 1995</b>     | Myanmar          | NA                   | Cross sectional | Adult                   | 383                | NA           | 19-45y       | 0               | 0.0  | Thick aNA thin blood smear | Falciparum                  | NA                           | Methaemoglobin reduction test  | NA                                          | 383              | <b>100</b> |
| <b>Orimadegun 2011</b>   | Nigeria          | NA                   | Cross sectional | Infant, Children        | 930                | 2.9y         | 0.5-12y      | 47              | 50.8 | Blood film                 | Falciparum                  | NA                           | NADPH                          | NA                                          | 930              | <b>100</b> |
| <b>Ruwende 1995</b>      | Gambia           | NA                   | case control    | children                | 1303               | 10y**        | NA           | 60              | 46.3 | NA                         | Falciparum                  | PCR-SSOP                     | NA                             | spectrophotometric methods                  | 881              | <b>68</b>  |
| <b>Ruwende 1995a</b>     | Kenya            | NA                   | case control    | children                | 804                | 10y**        | NA           | 40              | 50.4 | NA                         | Falciparum                  | PCR-SSOP                     | NA                             | spectrophotometric methods                  | 506              | <b>63</b>  |
| <b>Santana 2013</b>      | Brazil           | 2009 to 2010         | cross sectional | Children and Adult      | 1478               | NA           | 1-65y        | 0               | 0.0  | Blood film/microscopy      | NA                          | PCR-RFLP                     | NA                             | Enzymatic activity kit                      | 54               | <b>4</b>   |
| <b>Segeja 2008</b>       | Tanzania         | 2003                 | cross sectional | Children and Adult      | 212                | NA           | 0.5-45y      | 12              | 58.0 | Blood film/microscopy      | Falciparum                  | NA                           | NA                             | NADPH Fluorescent test                      | 84               | <b>40</b>  |
| <b>Segeja 2008a</b>      | Tanzania         | 2003                 | cross sectional | Children and Adult      | 203                | NA           | 0.5-45y      | 12              | 61.6 | Blood film/microscopy      | Falciparum                  | NA                           | NA                             | NADPH Fluorescent test                      | 19               | <b>17</b>  |
| <b>Shimizu 2005</b>      | Indonesia        | NA                   | cross sectional | children                | 210                | 11.6y        | 6-17y        | 11              | 52.4 | PCR                        | NA                          | NA                           | NA                             | Formazan ring method                        | 25               | <b>12</b>  |

|                          |           |              |                 |                    |      |      |        |    |      |                                                             |                                 |          |       |                                     |     |           |
|--------------------------|-----------|--------------|-----------------|--------------------|------|------|--------|----|------|-------------------------------------------------------------|---------------------------------|----------|-------|-------------------------------------|-----|-----------|
| <b>Syaiiyuni 2003</b>    | Indonesia | 1996 to 2002 | cross sectional | children           | 210  | NA   | NA     | 11 | 55.7 | Blood film/microscopy                                       | NA                              | PCR-RFLP | NA    | Formazan ring method                | 22  | <b>11</b> |
| <b>Tantular 1999</b>     | Indonesia | 1997-1998    | Cross sectional | NA                 | 2205 | NA   | NA     | 10 | 49.6 | Blood film, Antigen test (pLDH), Giemsa-stained blood smear | Falciparum, Vivax, and Malariae | NA       | NA    | Rapid G6PD test, Formazan ring test | 273 | <b>24</b> |
| <b>Tantular 1999a</b>    | Myanmar   | 1997-1998    | Cross sectional | NA                 | 2205 | NA   | NA     | 10 | 49.6 | Blood film, Antigen test (pLDH), Giemsa-stained blood smear | Falciparum, Vivax, and Malariae | NA       | NA    | Rapid G6PD test, Formazan ring test | 277 | <b>26</b> |
| <b>Theerathanon 2010</b> | Thailand  | 2006         | Cross sectional | Children and Adult | 102  | 40.0 | 15-75y | 62 | 60.8 | Blood film, Antigen test (pLDH), Giemsa-stained blood smear | NA                              | NA       | NADPH | Fluorescence spot test              | 89  | <b>87</b> |

**Table S3. Sensitivity Analysis (Effect of individual studies sorted by N)**

| Studies           | Order | Effect of exclusion of one study |          |           |         |         |
|-------------------|-------|----------------------------------|----------|-----------|---------|---------|
|                   |       | OR                               | Lower CI | Higher CI | Z-score | p-value |
| Adinortey 2011    | 1     | 0.81                             | 0.62     | 1.06      | 1.56    | 0.12    |
| Allison 1961      | 2     | 0.77                             | 0.56     | 1.05      | 1.64    | 0.10    |
| Awah 2012         | 3     | 0.73                             | 0.56     | 0.94      | 2.41    | 0.02    |
| Bienzle 1981      | 4     | 0.76                             | 0.56     | 1.04      | 1.70    | 0.09    |
| Brabin 1990       | 5     | 0.77                             | 0.58     | 1.02      | 1.84    | 0.07    |
| Brabin 1990a      | 6     | 0.78                             | 0.58     | 1.03      | 1.73    | 0.08    |
| Domarle 1999      | 7     | 0.82                             | 0.62     | 1.07      | 1.48    | 0.14    |
| Enevold 2008      | 8     | 0.77                             | 0.58     | 1.02      | 1.83    | 0.07    |
| Gilles 1967       | 9     | 0.81                             | 0.62     | 1.08      | 1.45    | 0.15    |
| Jalloh 2004       | 10    | 0.74                             | 0.56     | 0.98      | 2.06    | 0.04    |
| Jalloh 2004a      | 11    | 0.77                             | 0.58     | 1.03      | 1.75    | 0.08    |
| Kruatrachue 1962* | 12    | 0.74                             | 0.56     | 0.99      | 2.06    | 0.04    |
| Kruatrachue 1966  | 13    | 0.74                             | 0.56     | 0.98      | 2.07    | 0.04    |
| Ruwende 1995      | 14    | 0.81                             | 0.61     | 1.08      | 1.45    | 0.15    |
| Ruwende 1995a     | 15    | 0.78                             | 0.58     | 1.06      | 1.57    | 0.12    |
| Segeja 2008       | 16    | 0.82                             | 0.62     | 1.07      | 1.46    | 0.14    |
| Segeja 2008a      | 17    | 0.78                             | 0.59     | 1.03      | 1.72    | 0.08    |
| Tantular 1999     | 18    | 0.76                             | 0.56     | 1.01      | 1.90    | 0.06    |
| Tantular 1999a    | 19    | 0.76                             | 0.57     | 1.02      | 1.81    | 0.07    |
| Over all          |       | 0.77                             | 0.59     | 1.02      | 1.80    | 0.07    |

**Table S4. Sensitivity Analysis by Cumulative Meta-analysis sorted by N**

| Studies          | Order | 1           | 2           | 3           | 4           | 5           | 6           | 7           | 8           | 9           | 10          | 11          | 12          | 13          | 14          | 15          | 16          | 17          | 18          | 19           |
|------------------|-------|-------------|-------------|-------------|-------------|-------------|-------------|-------------|-------------|-------------|-------------|-------------|-------------|-------------|-------------|-------------|-------------|-------------|-------------|--------------|
| Adinortey 2011   |       | 1           |             |             |             |             |             |             |             |             |             |             |             |             |             |             |             |             |             |              |
| Allison 1961     |       |             | 2           |             |             |             |             |             |             |             |             |             |             |             |             |             |             |             |             |              |
| Awah 2012        |       |             |             | 3           |             |             |             |             |             |             |             |             |             |             |             |             |             |             |             |              |
| Bienzle 1981     |       |             |             |             | 4           |             |             |             |             |             |             |             |             |             |             |             |             |             |             |              |
| Brabin 1990      |       |             |             |             |             | 5           |             |             |             |             |             |             |             |             |             |             |             |             |             |              |
| Brabin 1990a     |       |             |             |             |             |             | 6           |             |             |             |             |             |             |             |             |             |             |             |             |              |
| Domarle 1999     |       |             |             |             |             |             |             | 7           |             |             |             |             |             |             |             |             |             |             |             |              |
| Enevold 2008     |       |             |             |             |             |             |             |             | 8           |             |             |             |             |             |             |             |             |             |             |              |
| Gilles 1967      |       |             |             |             |             |             |             |             |             | 9           |             |             |             |             |             |             |             |             |             |              |
| Jalloh 2004      |       |             |             |             |             |             |             |             |             |             | 10          |             |             |             |             |             |             |             |             |              |
| Jalloh 2004a     |       |             |             |             |             |             |             |             |             |             |             | 11          |             |             |             |             |             |             |             |              |
| Kruatrachue 1962 |       |             |             |             |             |             |             |             |             |             |             |             | 12          |             |             |             |             |             |             |              |
| Kruatrachue 1966 |       |             |             |             |             |             |             |             |             |             |             |             |             | 13          |             |             |             |             |             |              |
| Ruwende 1995     |       |             |             |             |             |             |             |             |             |             |             |             |             |             | 14          |             |             |             |             |              |
| Ruwende 1995a    |       |             |             |             |             |             |             |             |             |             |             |             |             |             |             | 15          |             |             |             |              |
| Segeja 2008      |       |             |             |             |             |             |             |             |             |             |             |             |             |             |             |             | 16          |             |             |              |
| Segeja 2008a     |       |             |             |             |             |             |             |             |             |             |             |             |             |             |             |             |             | 17          |             |              |
| Tantular 1999    |       |             |             |             |             |             |             |             |             |             |             |             |             |             |             |             |             |             | 18          |              |
| Tantular 1999a   |       |             |             |             |             |             |             |             |             |             |             |             |             |             |             |             |             |             |             | 19           |
|                  |       | 1           | 2           | 3           | 4           | 5           | 6           | 7           | 8           | 9           | 10          | 11          | 12          | 13          | 14          | 15          | 16          | 17          | 18          | 19           |
| <b>OR</b>        |       | <b>0.07</b> | <b>0.28</b> | <b>0.7</b>  | <b>0.85</b> | <b>0.88</b> | <b>0.86</b> | <b>0.72</b> | <b>0.75</b> | <b>0.67</b> | <b>0.75</b> | <b>0.76</b> | <b>0.82</b> | <b>0.87</b> | <b>0.82</b> | <b>0.8</b>  | <b>0.75</b> | <b>0.74</b> | <b>0.76</b> | <b>0.77</b>  |
| <b>Lower CI</b>  |       | <b>0.01</b> | <b>0.03</b> | <b>0.2</b>  | <b>0.45</b> | <b>0.49</b> | <b>0.51</b> | <b>0.42</b> | <b>0.45</b> | <b>0.41</b> | <b>0.48</b> | <b>0.51</b> | <b>0.56</b> | <b>0.61</b> | <b>0.58</b> | <b>0.59</b> | <b>0.55</b> | <b>0.55</b> | <b>0.57</b> | <b>0.59</b>  |
| <b>Higher CI</b> |       | <b>0.57</b> | <b>2.58</b> | <b>2.4</b>  | <b>1.06</b> | <b>1.57</b> | <b>1.45</b> | <b>1.24</b> | <b>1.24</b> | <b>1.09</b> | <b>1.16</b> | <b>1.13</b> | <b>1.19</b> | <b>1.23</b> | <b>1.14</b> | <b>1.08</b> | <b>1.02</b> | <b>1.01</b> | <b>1.02</b> | <b>1.02</b>  |
| <b>Z-score</b>   |       | <b>-2.5</b> | <b>-1.1</b> | <b>-0.5</b> | <b>-0.5</b> | <b>-0.4</b> | <b>-0.6</b> | <b>-1.2</b> | <b>-1.1</b> | <b>-1.6</b> | <b>-1.3</b> | <b>-1.4</b> | <b>-1.1</b> | <b>-0.8</b> | <b>-1.2</b> | <b>-1.5</b> | <b>-1.8</b> | <b>-1.9</b> | <b>-1.8</b> | <b>-1.80</b> |
| <b>p-value</b>   |       | <b>0.01</b> | <b>0.26</b> | <b>0.6</b>  | <b>0.62</b> | <b>0.67</b> | <b>0.57</b> | <b>0.24</b> | <b>0.26</b> | <b>0.1</b>  | <b>0.2</b>  | <b>0.18</b> | <b>0.29</b> | <b>0.43</b> | <b>0.23</b> | <b>0.15</b> | <b>0.07</b> | <b>0.06</b> | <b>0.07</b> | <b>0.07</b>  |

## Dynamics

| Studies          | Order | OR   | Z-scoip-value |     |
|------------------|-------|------|---------------|-----|
| Adinortey 2011   | 1     | 0.07 | -2.5          | 0   |
| Allison 1961     | 2     | 0.28 | -1.1          | 0.3 |
| Awah 2012        | 3     | 0.73 | -0.5          | 0.6 |
| Bienzle 1981     | 4     | 0.85 | -0.5          | 0.6 |
| Brabin 1990      | 5     | 0.88 | -0.4          | 0.7 |
| Brabin 1990a     | 6     | 0.86 | -0.6          | 0.6 |
| Domarle 1999     | 7     | 0.72 | -1.2          | 0.2 |
| Enevold 2008     | 8     | 0.75 | -1.1          | 0.3 |
| Gilles 1967      | 9     | 0.67 | -1.6          | 0.1 |
| Jalloh 2004      | 10    | 0.75 | -1.3          | 0.2 |
| Jalloh 2004a     | 11    | 0.76 | -1.4          | 0.2 |
| Kruatrachue 1962 | 12    | 0.82 | -1.1          | 0.3 |
| Kruatrachue 1966 | 13    | 0.59 | -1.5          | 0.4 |
| Ruwende 1995     | 14    | 0.82 | -1.2          | 0.2 |
| Ruwende 1995a    | 15    | 0.8  | -1.5          | 0.2 |
| Segeja 2008      | 16    | 0.75 | -1.80         | 0.1 |
| Segeja 2008a     | 17    | 0.74 | -1.9          | 0.1 |
| Tantular 1999    | 18    | 0.76 | -1.8          | 0.1 |
| Tantular 1999a   | 19    | 0.77 | -1.80         | 0.1 |

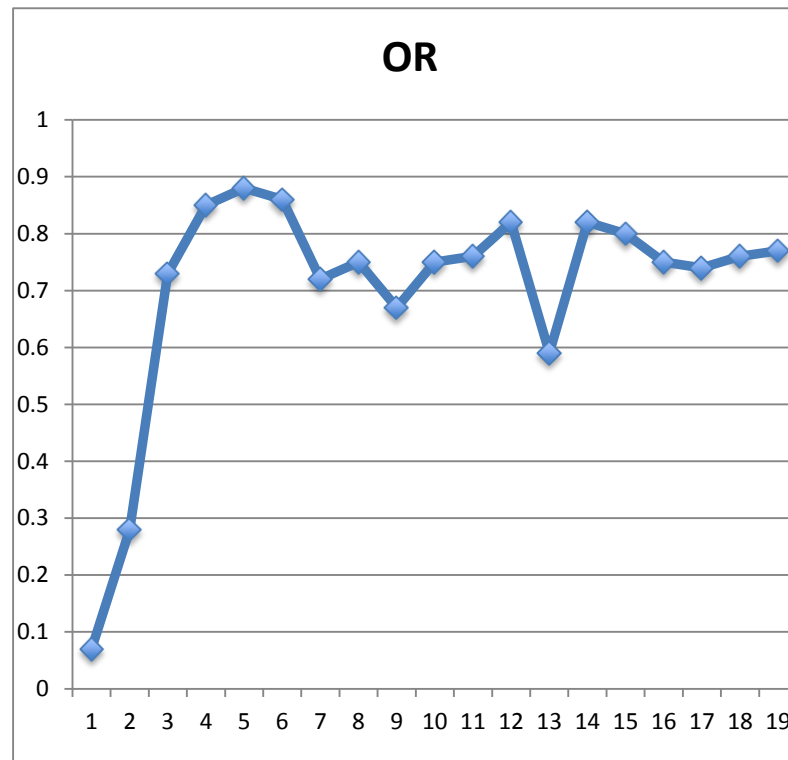

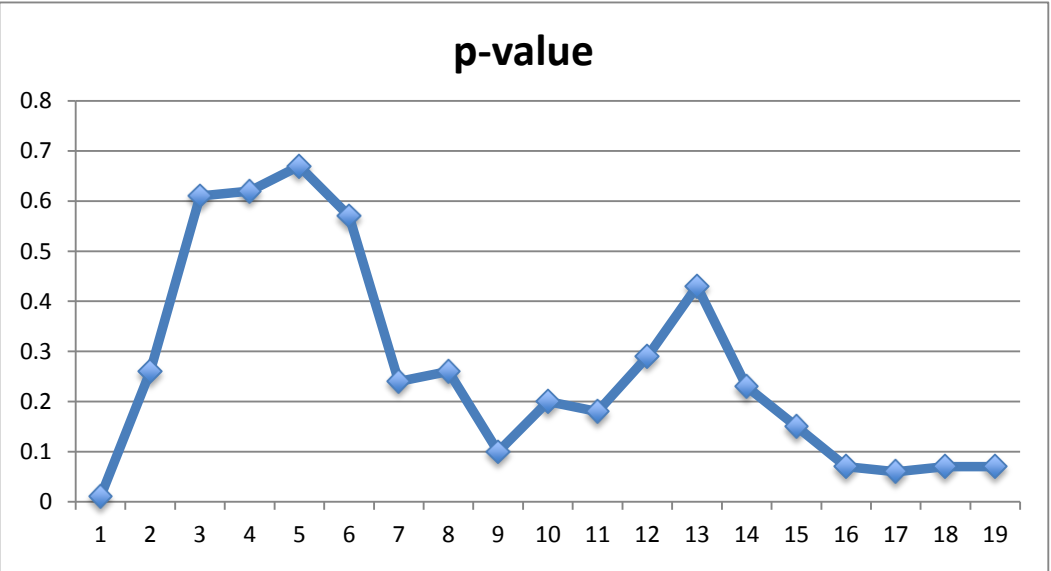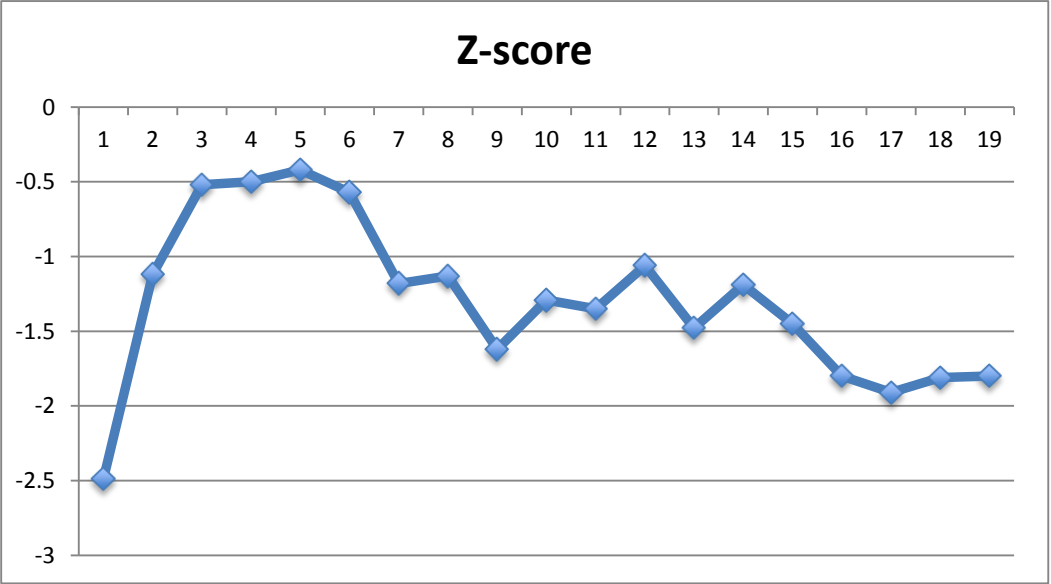



**Table 5. Sensitivity Analysis for heterozygous subgroup (Effect of individual studies)**

| Studies        | Order | Effect of exclusion of one study |             |             |             |              |
|----------------|-------|----------------------------------|-------------|-------------|-------------|--------------|
|                |       | OR                               | Lower CI    | Higher CI   | Z-score     | p-value      |
| Adinortey 2011 | 1     | 0.71                             | 0.57        | 0.88        | 3.13        | 0.002        |
| Allison 1961   | 2     | 0.66                             | 0.51        | 0.85        | 3.21        | 0.001        |
| Bienzle 1981   | 3     | 0.71                             | 0.55        | 0.91        | 2.65        | 0.008        |
| Enevold 2008   | 4     | 0.70                             | 0.56        | 0.87        | 3.26        | 0.001        |
| Ruwende 1995   | 5     | 0.73                             | 0.58        | 0.92        | 2.67        | 0.008        |
| Ruwende 1995a  | 6     | 0.72                             | 0.57        | 0.92        | 2.62        | 0.009        |
| <b>Overall</b> |       | <b>0.70</b>                      | <b>0.57</b> | <b>0.87</b> | <b>3.20</b> | <b>0.001</b> |

**Table S5. Sensitivity analysis for association between G6PD deficiency and hyperparasitemia (Effe**

| Effect of exclusion of one study |       |             |             |             |             |  |             |
|----------------------------------|-------|-------------|-------------|-------------|-------------|--|-------------|
| Studies                          | Order | OR          | Lower CI    | Higher CI   | Z-score     |  | p-value     |
| Gilles 1967                      | 1     | 0.81        | 0.61        | 1.08        | 1.44        |  | 0.15        |
| Allison 1961                     | 2     | 0.82        | 0.60        | 1.11        | 1.30        |  | 0.19        |
| Awah 2008                        | 3     | 0.73        | 0.56        | 0.96        | 2.29        |  | 0.02        |
| Myint 1997                       | 4     | 0.72        | 0.53        | 0.97        | 2.15        |  | 0.03        |
| Awah 2012                        | 5     | 0.72        | 0.55        | 0.95        | 2.35        |  | 0.02        |
| Lell 1999                        | 6     | 0.68        | 0.51        | 0.92        | 2.51        |  | 0.01        |
| Bienzle 1979                     | 7     | 0.69        | 0.52        | 0.91        | 2.58        |  | 0.01        |
| Kruatrachue 1966                 | 8     | 0.70        | 0.54        | 0.92        | 2.53        |  | 0.01        |
| <b>Overall</b>                   |       | <b>0.73</b> | <b>0.56</b> | <b>0.95</b> | <b>2.30</b> |  | <b>0.02</b> |

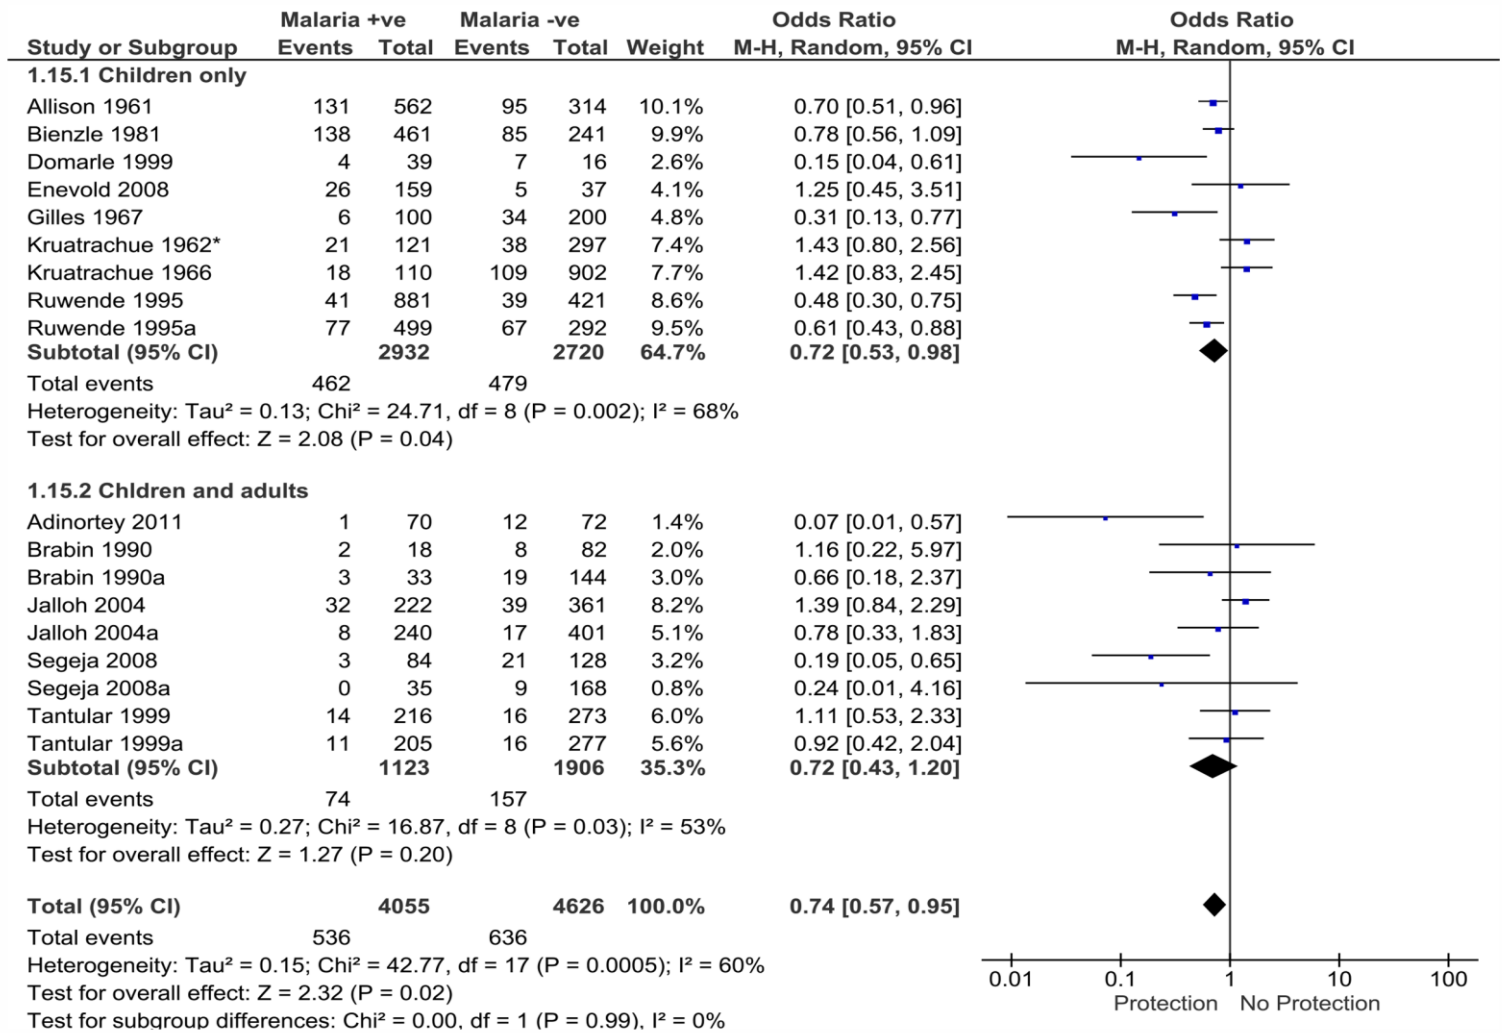

Figure S1. Meta-analysis forest plot for the association of G6PD with malaria (subgroup analysis by age). Presented is the meta-analysis forest plot of the association of G6PD deficiency and malaria, sub-grouped into age. There was no difference in the association between G6PD deficiency and malaria for studies on children and adults. However, there was negative association for studies performed on children alone.

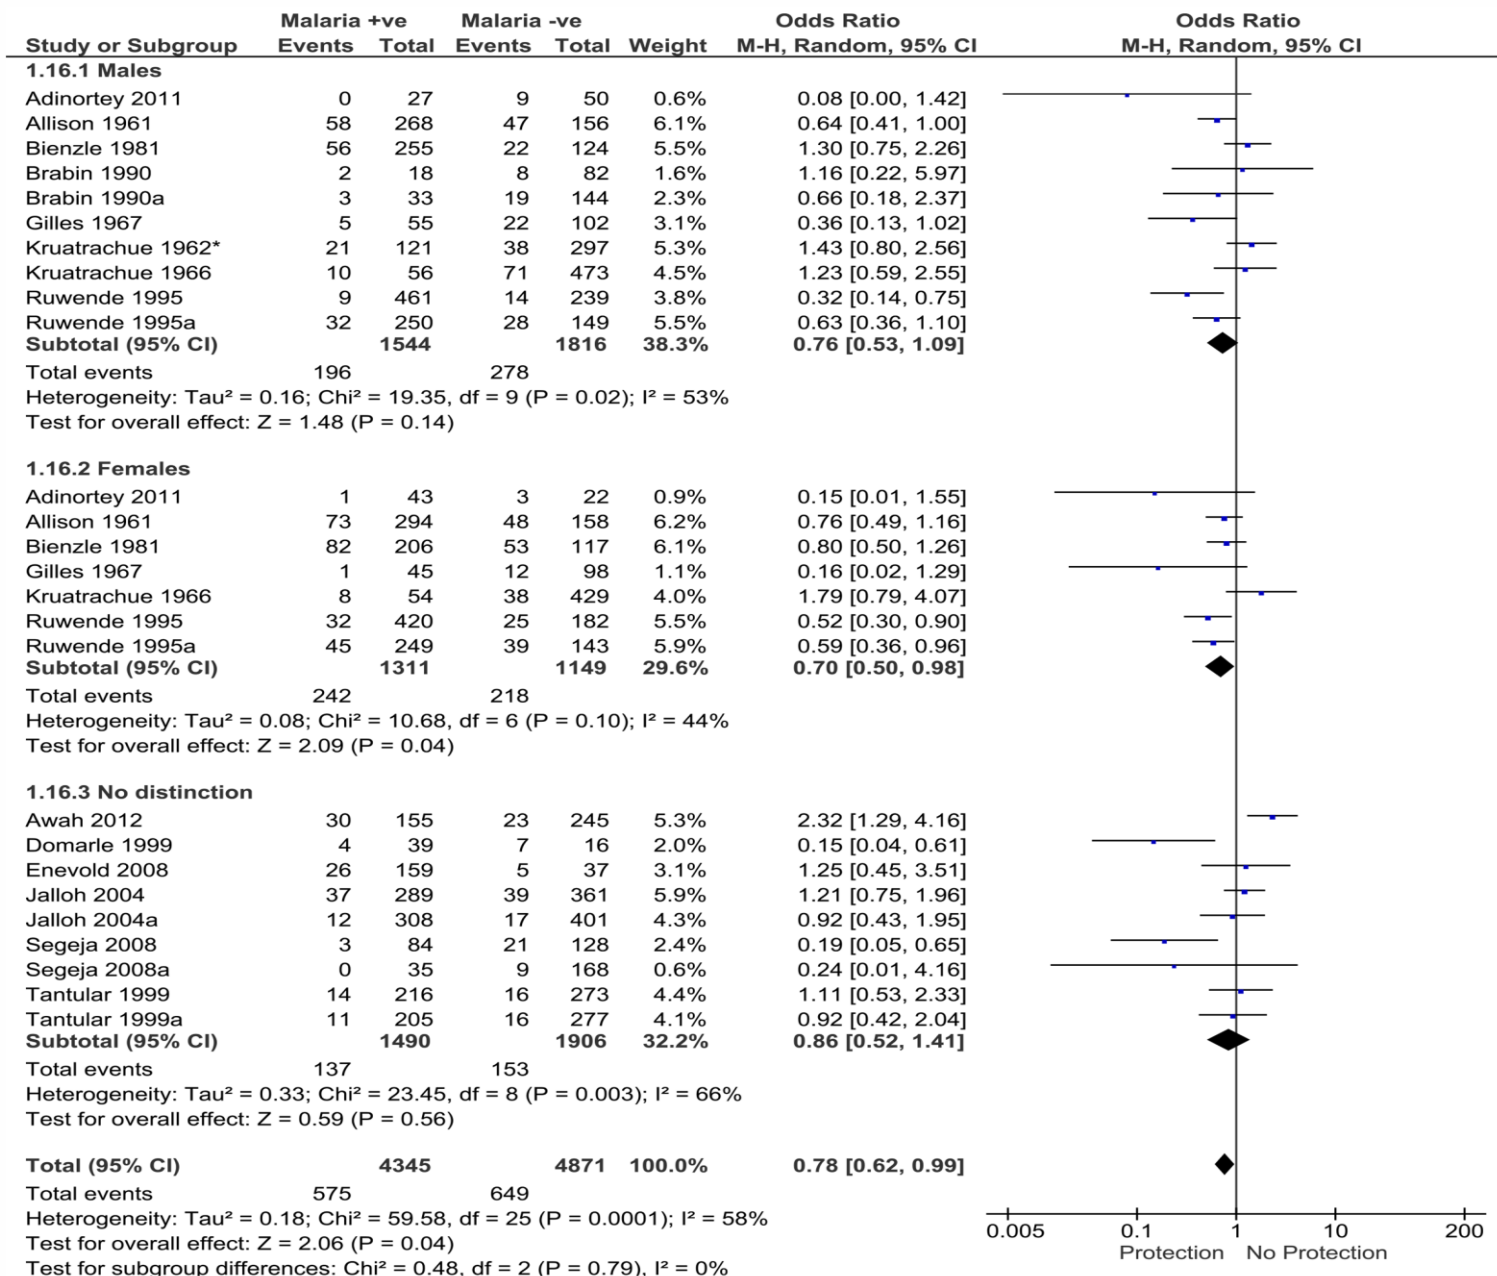

Figure S2. Meta-analysis forest plot for the association of G6PD with malaria (subgroup analysis by gender). Negative association was only found when female subjects were considered separately.

**a**

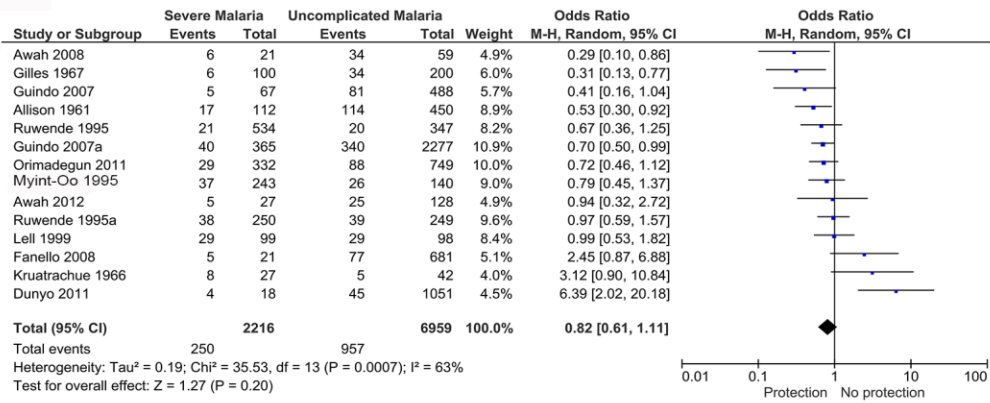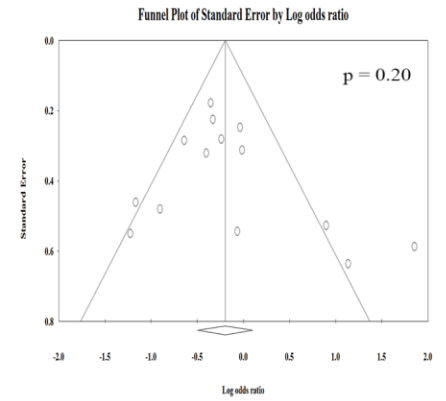

**b**

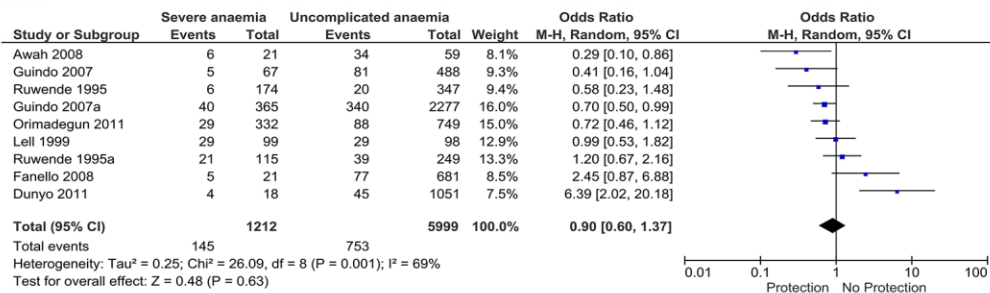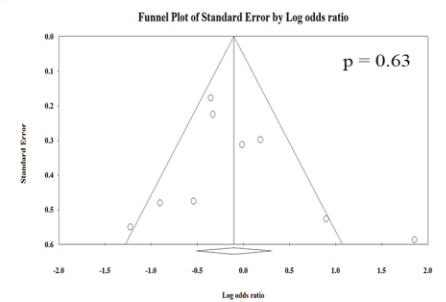

**c**

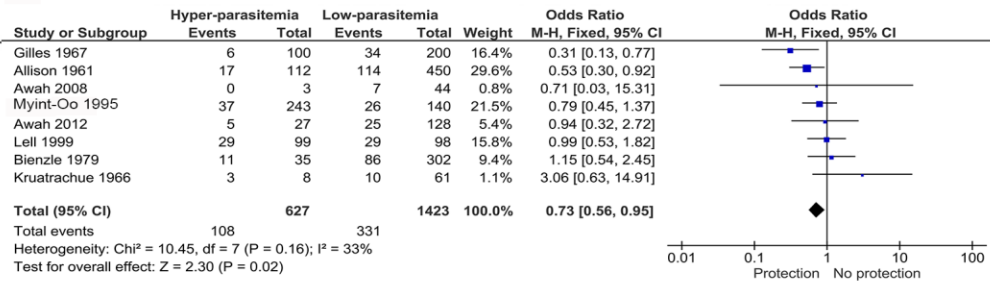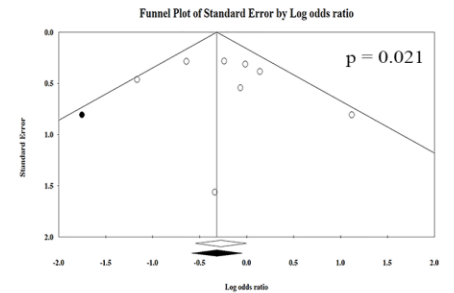

**d**

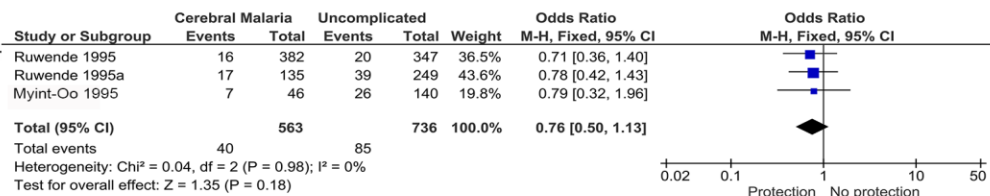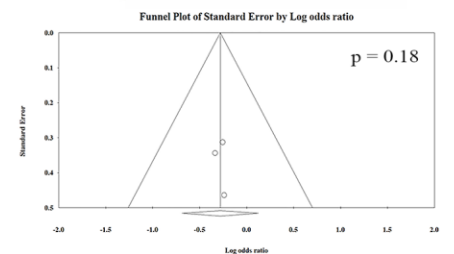

Figure S3. Association of G6PD deficiency with protection from severe malaria. (a) Meta-analysis was performed to assess association between G6PD deficiency and development of severe malaria using mild malaria patients as comparators. There was no publication bias as evident in the symmetry of the funnel plot. Generally, there was no association between G6PD deficiency and severe malaria. When the symptoms of severe malaria were considered separately, only hyper-parasitemia shows significant association (c), but there was no association between mild malaria and severe anemia (b) and cerebral malaria (d).

**a**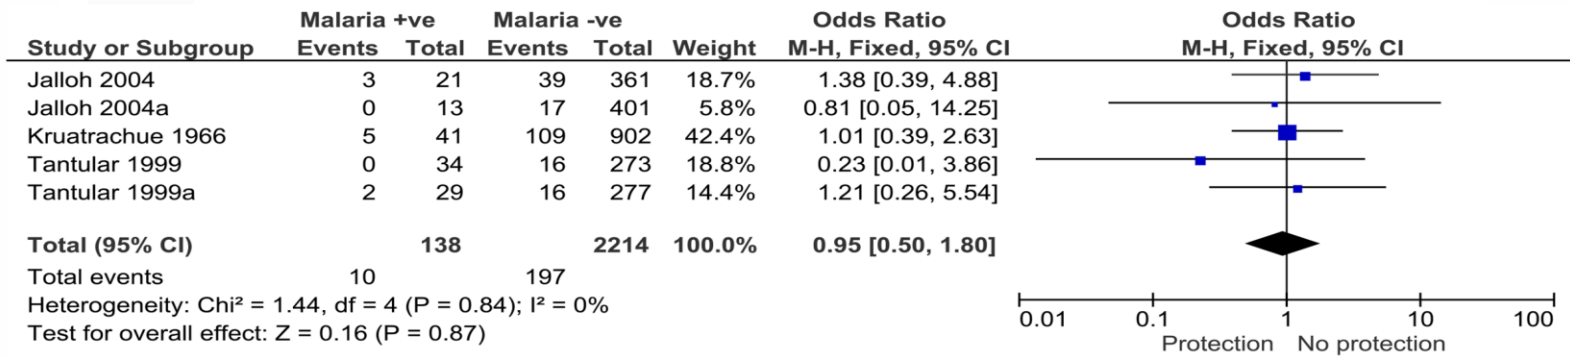**b**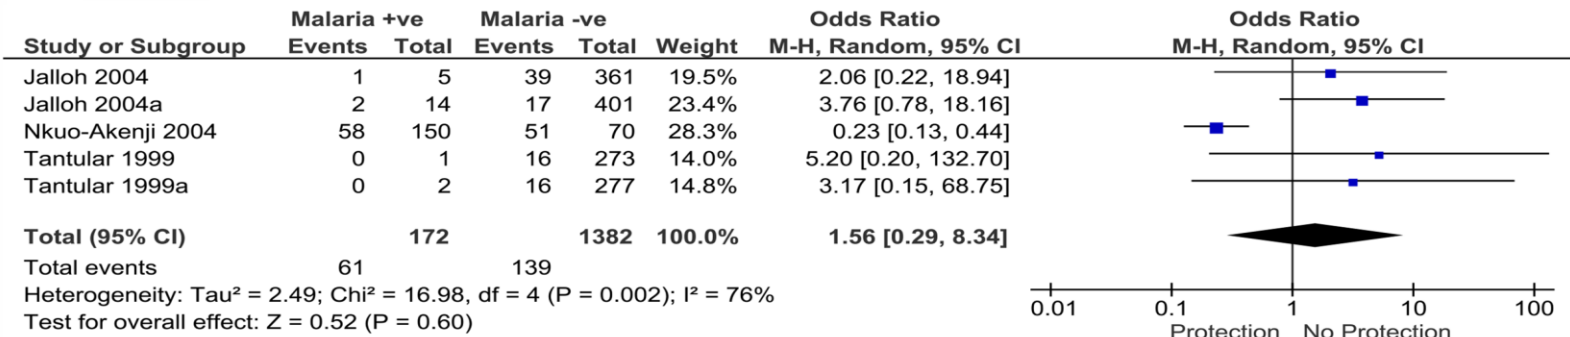**c**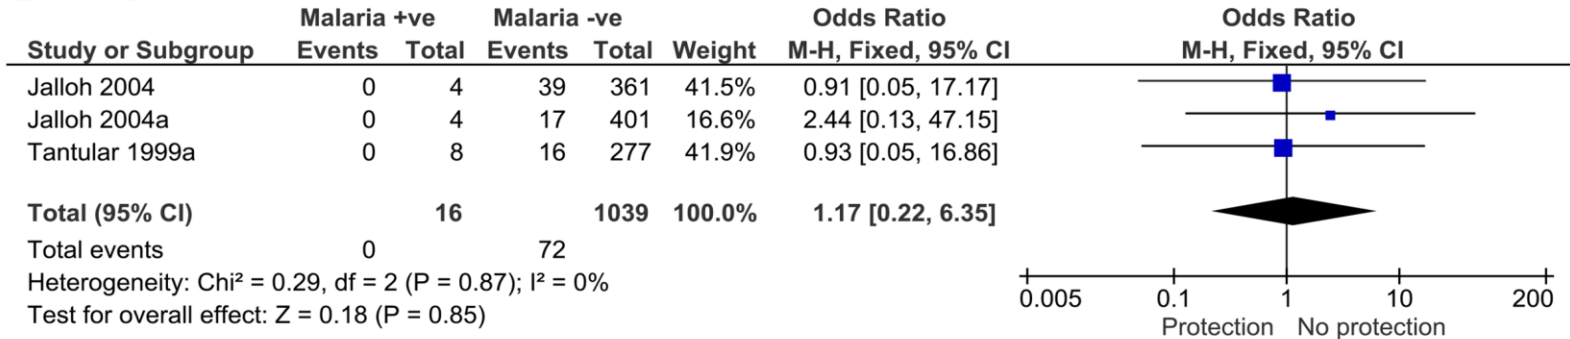**d**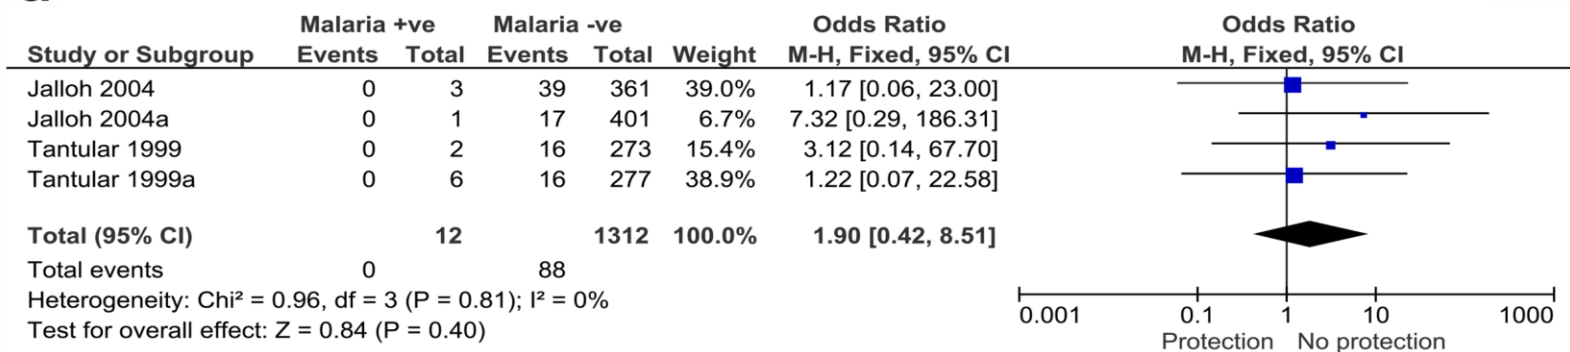

Figure S4. Meta-analysis forest plot for the association of G6PD with mixed malaria infection. The meta-analysis shows no association between G6PD and combined infection by *P. falciparum* and *P. vivax* (a), *P. falciparum* and *P. malariae* (b), *P. falciparum* and *P. malariae* (c), or *P. falciparum*, *P. vivax* and *P. malariae* (d)
